# Supplementary material for: Characterization of Clinical Features of Hospitalized Patients Due to the SARS-CoV-2 Infection in the Absence of Comorbidities Regarding the Sex: An Epidemiological Study of the First Year of the Pandemic in Brazil
Source: MDPI journal article supplement (doi:10.3390/ijerph19158895), 2022-07-22
Supplement: s1 [file s1]

**Title:** Characterization of Clinical Features of Hospitalized Patients due to the SARS-CoV-2 Infection in the Absence of Comorbidities Regarding the Sex: An Epidemiological Study of the First Year of the Pandemic in Brazil

**Short title:** Sex and COVID-19

**Table S1.** Distribution of patients hospitalized with the severe acute respiratory syndrome (SARS) due to Coronavirus Disease (COVID)-19 in Brazil according to patients' sex in the federative unit of residence.

| State and Federal District | Male             | Female           | Total            |
|----------------------------|------------------|------------------|------------------|
| Acre                       | 821 (0.4%)       | 468 (0.3%)       | 1289 (0.4%)      |
| Alagoas                    | 2161 (1.0%)      | 1364 (1.1%)      | 3525 (1.0%)      |
| Amazonas                   | 8833 (4.1%)      | 5983 (4.9%)      | 14,816 (4.4%)    |
| Amapá                      | 785 (0.4%)       | 514 (0.4%)       | 1299 (0.4%)      |
| Bahia                      | 6612 (3.1%)      | 3498 (2.8%)      | 10,110 (3.0%)    |
| Ceará                      | 12547 (3.7%)     | 4626 (3.8%)      | 12,547 (3.7%)    |
| Federal District           | 4864 (2.3%)      | 1820 (1.5%)      | 6684 (2.0%)      |
| Espírito Santo             | 1814 (0.9%)      | 1041 (0.8%)      | 2855 (0.8%)      |
| Goiás                      | 7967 (3.7%)      | 4603 (3.7%)      | 12,570 (3.7%)    |
| Maranhão                   | 2583 (1.2%)      | 1548 (1.3%)      | 4131 (1.2%)      |
| Minas Gerais               | 14,640 (6.9%)    | 8616 (7.0%)      | 23,256 (6.9%)    |
| Mato Grosso do Sul         | 3471 (1.6%)      | 2101 (1.7%)      | 5572 (1.7%)      |
| Mato Grosso                | 8529 (4.0%)      | 6436 (5.2%)      | 14,965 (4.4%)    |
| Pará                       | 7896 (3.7%)      | 4704 (3.8%)      | 12,600 (3.7%)    |
| Paraíba                    | 2905 (1.4%)      | 1865 (1.5%)      | 4770 (1.4%)      |
| Pernambuco                 | 8196 (3.8%)      | 4899 (4.0%)      | 13,095 (3.9%)    |
| Piauí                      | 2683 (1.3%)      | 1432 (1.2%)      | 4115 (1.2%)      |
| Paraná                     | 11,507 (5.4%)    | 6679 (5.4%)      | 18,186 (5.4%)    |
| Rio de Janeiro             | 19,206 (9.0%)    | 10,706 (8.7%)    | 29,912 (8.9%)    |
| Rio Grande do Norte        | 1713 (0.8%)      | 844 (0.7%)       | 2557 (0.8%)      |
| Rondônia                   | 2437 (1.1%)      | 1312 (1.1%)      | 3749 (1.1%)      |
| Roraima                    | 512 (0.2%)       | 286 (0.2%)       | 798 (0.2%)       |
| Rio Grande do Sul          | 10,487 (4.9%)    | 6153 (5.0%)      | 16,640 (4.9%)    |
| Santa Catarina             | 8513 (4.0%)      | 4591 (3.7%)      | 13,104 (3.9%)    |
| Sergipe                    | 2522 (1.2%)      | 1423 (1.2%)      | 3945 (1.2%)      |
| São Paulo                  | 62,174 (29.2%)   | 35,068 (28.4%)   | 97,242 (28.9%)   |
| Tocantins                  | 1399 (0.7%)      | 732 (0.6%)       | 2131 (0.6%)      |
| Total                      | 213,151 (100.0%) | 123,312 (100.0%) | 336,463 (100.0%) |

We presented the data using absolute (N) and relative (%) frequencies.

**Table S2.** The distribution of patients hospitalized with the severe acute respiratory syndrome (SARS) due to Coronavirus Disease (COVID)-19 in Brazil according to sex, weeks of disease notification, and the start of clinical signs.

| Weeks | Week of notification |              |       | Week of first clinical signs |              |       |
|-------|----------------------|--------------|-------|------------------------------|--------------|-------|
|       | Male                 | Female       | Total | Male                         | Female       | Total |
| 8     | 1 (100.0%)           | 0 (0.0%)     | 1     | 10 (55.6%)                   | 8 (44.4%)    | 18    |
| 9     | 4 (50.0%)            | 4 (50.0%)    | 8     | 13 (40.6%)                   | 19 (59.4%)   | 32    |
| 10    | 1 (25.0%)            | 3 (75.0%)    | 4     | 50 (61.7%)                   | 31 (38.3%)   | 81    |
| 11    | 18 (60.0%)           | 12 (40.0%)   | 30    | 257 (63.6%)                  | 147 (36.4%)  | 404   |
| 12    | 214 (60.3%)          | 141 (39.7%)  | 355   | 869 (64.3%)                  | 483 (35.7%)  | 1352  |
| 13    | 750 (63.8%)          | 425 (36.2%)  | 1175  | 1268 (66.5%)                 | 638 (33.5%)  | 1906  |
| 14    | 1274 (65.0%)         | 687 (35.0%)  | 1961  | 1651 (65.1%)                 | 887 (34.9%)  | 2538  |
| 15    | 1517 (65.8%)         | 789 (34.2%)  | 2306  | 2452 (66.3%)                 | 1244 (33.7%) | 3696  |
| 16    | 2359 (65.0%)         | 1270 (35.0%) | 3629  | 3488 (65.8%)                 | 1811 (34.2%) | 5299  |
| 17    | 3165 (65.0%)         | 1703 (35.0%) | 4868  | 4608 (66.3%)                 | 2340 (33.7%) | 6948  |
| 18    | 4005 (65.2%)         | 2135 (34.8%) | 6140  | 5099 (64.9%)                 | 2752 (35.1%) | 7851  |
| 19    | 4516 (64.6%)         | 2473 (35.4%) | 6989  | 5142 (64.1%)                 | 2875 (35.9%) | 8017  |
| 20    | 5005 (65.4%)         | 2648 (34.6%) | 7653  | 5528 (65.2%)                 | 2957 (34.8%) | 8485  |
| 21    | 5088 (64.7%)         | 2778 (35.3%) | 7866  | 4737 (63.6%)                 | 2716 (36.4%) | 7453  |
| 22    | 4584 (63.3%)         | 2657 (36.7%) | 7241  | 4185 (62.1%)                 | 2557 (37.9%) | 6742  |
| 23    | 4193 (63.2%)         | 2446 (36.8%) | 6639  | 4712 (62.4%)                 | 2844 (37.6%) | 7556  |
| 24    | 4415 (63.6%)         | 2530 (36.4%) | 6945  | 4674 (62.7%)                 | 2779 (37.3%) | 7453  |
| 25    | 4851 (61.9%)         | 2987 (38.1%) | 7838  | 5158 (62.1%)                 | 3144 (37.9%) | 8302  |
| 26    | 4840 (62.9%)         | 2858 (37.1%) | 7698  | 4520 (62.8%)                 | 2679 (37.2%) | 7199  |
| 27    | 4882 (63.0%)         | 2871 (37.0%) | 7753  | 4945 (62.1%)                 | 3014 (37.9%) | 7959  |
| 28    | 4932 (62.5%)         | 2960 (37.5%) | 7892  | 4818 (64.7%)                 | 2625 (35.3%) | 7443  |
| 29    | 4654 (64.3%)         | 2583 (35.7%) | 7228  | 4282 (64.6%)                 | 2350 (35.4%) | 6632  |
| 30    | 4692 (63.6%)         | 2680 (36.4%) | 7372  | 3865 (62.5%)                 | 2319 (37.5%) | 6.184 |
| 31    | 4118 (63.6%)         | 2356 (36.4%) | 6474  | 3574 (62.9%)                 | 2104 (37.1%) | 5678  |
| 32    | 3583 (63.8%)         | 2035 (36.2%) | 5618  | 3255 (64.0%)                 | 1834 (36.0%) | 5089  |
| 33    | 3375 (63.2%)         | 1961 (36.8%) | 5336  | 3313 (64.9%)                 | 1791 (35.1%) | 5104  |
| 34    | 3249 (64.4%)         | 1795 (35.6%) | 5044  | 3026 (63.0%)                 | 1780 (37.0%) | 4806  |
| 35    | 3129 (63.2%)         | 1824 (36.8%) | 4953  | 2779 (63.7%)                 | 1551 (36.3%) | 4271  |
| 36    | 3058 (64.2%)         | 1704 (35.8%) | 4762  | 2779 (63.9%)                 | 1573 (36.1%) | 4352  |
| 37    | 2705 (62.7%)         | 1611 (37.3%) | 4316  | 2416 (61.9%)                 | 1490 (38.1%) | 3906  |
| 38    | 2626 (62.5%)         | 1573 (37.5%) | 4199  | 2083 (61.9%)                 | 1280 (38.1%) | 3363  |
| 39    | 2390 (62.6%)         | 1428 (37.4%) | 3818  | 2052 (61.6%)                 | 1277 (38.4%) | 3329  |
| 40    | 2196 (62.2%)         | 1336 (37.8%) | 3532  | 1997 (62.4%)                 | 1204 (37.6%) | 3201  |
| 41    | 2019 (61.7%)         | 1253 (38.3%) | 3272  | 1897 (61.8%)                 | 1171 (38.2%) | 3068  |
| 42    | 1779 (62.1%)         | 1085 (37.9%) | 2864  | 1804 (63.5%)                 | 1038 (36.5%) | 2842  |
| 43    | 1886 (62.7%)         | 1122 (37.3%) | 3008  | 1909 (64.2%)                 | 1064 (35.8%) | 2973  |
| 44    | 1902 (63.1%)         | 1110 (36.9%) | 3012  | 1901 (63.5%)                 | 1094 (36.5%) | 2995  |
| 45    | 1931 (64.2%)         | 1079 (35.8%) | 3010  | 2715 (64.2%)                 | 1515 (35.8%) | 4230  |
| 46    | 2392 (64.1%)         | 1337 (35.9%) | 3729  | 3144 (64.5%)                 | 1733 (35.5%) | 4877  |
| 47    | 3036 (63.2%)         | 1767 (36.8%) | 4803  | 3744 (63.9%)                 | 2111 (36.1%) | 5855  |
| 48    | 3562 (63.7%)         | 2032 (36.3%) | 5594  | 3835 (64.1%)                 | 2146 (35.9%) | 5981  |
| 49    | 3907 (64.3%)         | 2165 (35.7%) | 6072  | 4206 (63.4%)                 | 2429 (36.6%) | 6635  |
| 50    | 3972 (63.5%)         | 2285 (36.5%) | 6257  | 3732 (62.2%)                 | 2268 (37.8%) | 6000  |
| 51    | 3824 (62.9%)         | 2259 (37.1%) | 6083  | 3405 (62.5%)                 | 2042 (37.5%) | 5447  |
| 52    | 3347 (63.0%)         | 1967 (37.0%) | 5314  | 3828 (63.0%)                 | 2251 (37.0%) | 6079  |

|       |                 |                 |         |                 |                 |         |
|-------|-----------------|-----------------|---------|-----------------|-----------------|---------|
| 53    | 3558 (62.6%)    | 2130 (37.4%)    | 5688    | 4349 (60.8%)    | 2802 (39.2%)    | 7151    |
| 54    | 4354 (60.8%)    | 2809 (39.2%)    | 7163    | 4597 (61.8%)    | 2845 (38.2%)    | 7442    |
| 55    | 4535 (61.9%)    | 2789 (38.1%)    | 7324    | 4551 (62.5%)    | 2726 (37.5%)    | 7277    |
| 56    | 4436 (62.5%)    | 2664 (37.5%)    | 7100    | 3991 (62.0%)    | 2448 (38.0%)    | 6439    |
| 57    | 3951 (62.6%)    | 2365 (37.4%)    | 6316    | 3772 (62.7%)    | 2247 (37.3%)    | 6019    |
| 58    | 4143 (63.3%)    | 2433 (37.0%)    | 6576    | 4706 (62.2%)    | 2857 (37.8%)    | 7563    |
| 59    | 4389 (62.4%)    | 2645 (37.6%)    | 7034    | 5541 (63.7%)    | 3164 (36.3%)    | 8705    |
| 60    | 4974 (62.7%)    | 2958 (37.3%)    | 7932    | 7197 (63.9%)    | 4073 (36.1%)    | 11,270  |
| 61    | 6491 (63.1%)    | 3793 (36.9%)    | 10,284  | 7610 (63.7%)    | 4331 (36.3%)    | 11,941  |
| 62    | 7770 (63.3%)    | 4508 (36.7%)    | 12,278  | 10,021 (63.6%)  | 5728 (36.4%)    | 15,749  |
| 63    | 8934 (63.4%)    | 5164 (36.6%)    | 14,098  | 8725 (63.2%)    | 5077 (36.8%)    | 13,802  |
| 64    | 9297 (63.5%)    | 5345 (36.5%)    | 14,642  | 6259 (63.3%)    | 3626 (36.7%)    | 9885    |
| 65    | 8099 (63.8%)    | 4602 (36.2%)    | 12,701  | 1980 (60.5%)    | 1294 (39.5%)    | 3274    |
| 66    | 4176 (64.1%)    | 2334 (35.9%)    | 6510    | 186 (59.2%)     | 128 (40.8%)     | 314     |
| 67    | 107 (68.6%)     | 49 (31.4%)      | 156     | 0 (0.0%)        | 1               | 1       |
| Total | 213,151 (63.4%) | 123,312 (36.6%) | 336,463 | 213,151 (63.4%) | 123,312 (36.6%) | 336,463 |

We presented the data using absolute (N) and relative (%) frequencies.

**Table S3.** Characterization of patients hospitalized with the severe acute respiratory syndrome (SARS) due to Coronavirus Disease (COVID)-19.

| Patients' features                         | Marker                                    | N (%)           |
|--------------------------------------------|-------------------------------------------|-----------------|
| Sex                                        | Male                                      | 213,151 (63.4%) |
|                                            | Female                                    | 123,312 (36.6%) |
| Age                                        | <1 year old                               | 3625 (1.1%)     |
|                                            | 1-12 years old                            | 5638 (1.7%)     |
|                                            | 13-24 years old                           | 9774 (2.9%)     |
|                                            | 25-60 years old                           | 203,144 (60.4%) |
|                                            | 61-72 years old                           | 61,803 (18.4%)  |
|                                            | +85 years old                             | 39,639 (11.8%)  |
| Race                                       | White                                     | 126,871 (47.8%) |
|                                            | Black                                     | 12,271 (4.6%)   |
|                                            | Asian                                     | 3458 (1.3%)     |
|                                            | <i>Pardos</i> (Multiracial background)    | 121,505 (45.8%) |
|                                            | Indigenous                                | 1234 (0.4%)     |
| Schooling                                  | Illiterate                                | 6038 (4.9%)     |
|                                            | Elementary school (1 <sup>st</sup> stage) | 24,076 (19.7%)  |
|                                            | Elementary school (2 <sup>nd</sup> stage) | 19,739 (16.1%)  |
|                                            | High school                               | 44,857 (36.6%)  |
|                                            | Higher education                          | 23,477 (19.2%)  |
|                                            | Not applicable                            | 4336 (3.5%)     |
| Place of residence                         | Urban                                     | 276,515 (94.7%) |
|                                            | Rural                                     | 14,572 (5.0%)   |
|                                            | Peri-urban                                | 960 (0.3%)      |
| Residence in Influenza outbreak area       | Yes                                       | 64,192 (30.8%)  |
|                                            | No                                        | 144,462 (69.2%) |
| Presence of nosocomial infection           | Yes                                       | 3375 (1.5%)     |
|                                            | No                                        | 221,342 (98.5%) |
| Clinical symptoms                          |                                           |                 |
| Fever                                      | Yes                                       | 210,247 (74.2%) |
| Cough                                      | Yes                                       | 234,488 (81.0%) |
| Sore throat                                | Yes                                       | 73,488 (31.2%)  |
| Dyspnea                                    | Yes                                       | 219,367 (77.0%) |
| Respiratory distress                       | Yes                                       | 179,547 (67.9%) |
| Peripheral arterial oxygen saturation <95% | Yes                                       | 174,584 (65.9%) |
| Diarrhea                                   | Yes                                       | 45,518 (20.1%)  |
| Vomit                                      | Yes                                       | 25,426 (11.5%)  |
| Abdominal pain                             | Yes                                       | 15,673 (9.9%)   |
| Fatigue and asthenia                       | Yes                                       | 68,408 (39.6%)  |
| Loss of smell                              | Yes                                       | 34,960 (21.1%)  |
| Loss of taste                              | Yes                                       | 32,579 (19.9%)  |
| Myalgia                                    | Yes                                       | 36,584 (16.5%)  |
| Headache                                   | Yes                                       | 36,591 (16.5%)  |
| Coryza                                     | Yes                                       | 9876 (4.4%)     |
| Inappetence                                | Yes                                       | 6196 (2.8%)     |
| Nasal obstruction                          | Yes                                       | 1543 (0.7%)     |
| Vertigo                                    | Yes                                       | 1291 (0.6%)     |
| Prostration                                | Yes                                       | 3961 (1.8%)     |

|                                                |                          |                 |
|------------------------------------------------|--------------------------|-----------------|
| Nausea                                         | Yes                      | 3797 (1.7%)     |
| Malaise                                        | Yes                      | 3312 (1.5%)     |
| Chills                                         | Yes                      | 2331 (1.0%)     |
| Chest pain                                     | Yes                      | 6517 (2.9%)     |
| Back pain                                      | Yes                      | 3277 (1.5%)     |
| Arthralgia                                     | Yes                      | 1183 (0.5%)     |
| Antiviral drug to treat flu symptoms           | Yes                      | 32,322 (14.2%)  |
|                                                | No                       | 195,014 (85.8%) |
| Thorax X-ray                                   | Normal                   | 6320 (3.9%)     |
|                                                | Interstitial infiltrate  | 40,439 (24.8%)  |
|                                                | Consolidation            | 4426 (2.7%)     |
|                                                | Mixed                    | 5873 (3.6%)     |
|                                                | Other findings           | 21,384 (13.1%)  |
|                                                | Not carried out          | 84,552 (51.9%)  |
| Thorax high-resolution computerized tomography | Typical COVID-19         | 90,227 (65.9%)  |
|                                                | undetermined COVID-19    | 3454 (2.5%)     |
|                                                | Atypical COVID-19        | 1782 (1.3%)     |
|                                                | Negative for pneumonia   | 469 (0.3%)      |
|                                                | Not carried out          | 5142 (3.8%)     |
|                                                | Ignored                  | 35,744 (26.1%)  |
| Intensive care unit                            | Yes                      | 75,465 (28.4%)  |
|                                                | No                       | 190,458 (71.6%) |
| Use of ventilatory support                     | Invasive                 | 37,920 (14.3%)  |
|                                                | Noninvasive              | 142,070 (53.7%) |
|                                                | Not necessary            | 84,414 (31.9%)  |
| Closing criterion                              | Laboratory               | 296,625 (92.4%) |
|                                                | Epidemiological clinical | 3436 (1.1%)     |
|                                                | Clinical                 | 7952 (2.5%)     |
|                                                | Image clinical           | 12,856 (4.0%)   |
| Outcome                                        | Cure                     | 206,810 (73.7%) |
|                                                | Death                    | 73,723 (26.3%)  |

Data presented as absolute (N) and relative (%) frequencies.

**Table S4.** Multivariate analysis determines death predictors in patients with Coronavirus Disease and morbidities in Brazil.

| Death predictors <sup>a</sup>             | B      | SE    | Wald      | df | P      | OR     | 95% CI |         |
|-------------------------------------------|--------|-------|-----------|----|--------|--------|--------|---------|
|                                           |        |       |           |    |        |        | Lower  | Higher  |
| Sex (Male)                                | 0.096  | 0.044 | 4.891     | 1  | 0.027  | 1.101  | 1.011  | 1.199   |
| Age                                       |        |       |           |    |        |        |        |         |
| <1 year old                               |        |       | 1.291.316 | 6  | <0.001 |        |        |         |
| 1-12 years old                            | -0.566 | 1.205 | 0.220     | 1  | 0.639  | 0.568  | 0.054  | 6.030   |
| 13-24 years old                           | 1.035  | 1.106 | 0.875     | 1  | 0.349  | 2.815  | 0.322  | 24.595  |
| 25-60 years old                           | 1.627  | 1.089 | 2.232     | 1  | 0.135  | 5.090  | 0.602  | 43.038  |
| 61-72 years old                           | 2.759  | 1.090 | 6.410     | 1  | 0.011  | 15.778 | 1.865  | 133.492 |
| 73-85 years old                           | 3.465  | 1.090 | 10.113    | 1  | 0.001  | 31.978 | 3.779  | 270.600 |
| +85 years old                             | 4.240  | 1.092 | 15.078    | 1  | <0.001 | 69.385 | 8.164  | 589.705 |
| Race                                      |        |       |           |    |        |        |        |         |
| White                                     |        |       | 115.881   | 4  | <0.001 |        |        |         |
| Black                                     | 0.221  | 0.105 | 4.448     | 1  | 0.035  | 1.247  | 1.016  | 1.531   |
| Asian                                     | 0.349  | 0.201 | 3.015     | 1  | 0.082  | 1.417  | 0.956  | 2.101   |
| <i>Pardos</i> (Multiracial background)    | 0.461  | 0.045 | 103.179   | 1  | <0.001 | 1.585  | 1.450  | 1.732   |
| Indigenous                                | 1.159  | 0.256 | 20.423    | 1  | <0.001 | 3.186  | 1.927  | 5.266   |
| Schooling                                 |        |       |           |    |        |        |        |         |
| Illiterate                                | 0.726  | 0.105 | 47.751    | 1  | <0.001 | 2.066  | 1.682  | 2.538   |
| Elementary school (1 <sup>st</sup> stage) | 0.547  | 0.074 | 55.258    | 1  | <0.001 | 1.728  | 1.496  | 1.997   |
| Elementary school (2 <sup>nd</sup> stage) | 0.404  | 0.075 | 28.666    | 1  | <0.001 | 1.497  | 1.292  | 1.736   |
| High school                               | 0.209  | 0.069 | 9.128     | 1  | 0.003  | 1.232  | 1.076  | 1.411   |
| Higher education                          |        |       | 78.960    | 4  | <0.001 |        |        |         |
| Zone (Rural or peri-urban)                | -0.179 | 0.093 | 3.665     | 1  | 0.056  | 0.836  | 0.696  | 1.004   |
| Residence in the Influenza outbreak area  | 0.107  | 0.048 | 4.968     | 1  | 0.026  | 1.113  | 1.013  | 1.222   |
| Clinical symptoms                         |        |       |           |    |        |        |        |         |
| Dyspnea                                   | 0.208  | 0.053 | 15.498    | 1  | <0.001 | 1.231  | 1.110  | 1.365   |
| SpO <sub>2</sub>                          | 0.312  | 0.050 | 38.578    | 1  | <0.001 | 1.367  | 1.238  | 1.508   |
| Diarrhea                                  | -0.112 | 0.056 | 3.986     | 1  | 0.046  | 0.894  | 0.800  | 0.998   |
| Myalgia                                   | -0.282 | 0.077 | 13.489    | 1  | <0.001 | 0.754  | 0.648  | 0.877   |
| Headache                                  | -0.252 | 0.076 | 10.931    | 1  | 0.001  | 0.777  | 0.670  | 0.903   |
| Inappetence                               | -0.270 | 0.145 | 3.502     | 1  | 0.061  | 0.763  | 0.575  | 1.013   |
| Cyanosis                                  | 0.973  | 0.574 | 2.866     | 1  | 0.090  | 2.645  | 0.858  | 8.155   |
| Nasal obstruction                         | -1.051 | 0.590 | 3.171     | 1  | 0.075  | 0.350  | 0.110  | 1.112   |
| Nausea                                    | -0.415 | 0.238 | 3.026     | 1  | 0.082  | 0.660  | 0.414  | 1.054   |
| Flu vaccination                           | -0.337 | 0.049 | 47.211    | 1  | <0.001 | 0.714  | 0.649  | 0.786   |
| Need for ICU                              | 1.121  | 0.049 | 527.915   | 1  | <0.001 | 3.069  | 2.789  | 3.377   |
| Need for ventilatory support              |        |       |           |    |        |        |        |         |
| Ventilatory support                       |        |       | 1.212.079 | 2  | <0.001 |        |        |         |
| Invasive                                  | 2.320  | 0.074 | 986.304   | 1  | <0.001 | 10.174 | 8.803  | 11.759  |
| Noninvasive                               | 0.475  | 0.057 | 68.752    | 1  | <0.001 | 1.609  | 1.438  | 1.800   |
| Not needed                                |        |       |           |    |        |        |        |         |
| Constant                                  | -5.601 | 1.092 | 26.311    | 1  | <0.001 | 0.004  |        |         |

---

SE, standard error; df, degrees of freedom; OR, odds ratio; 95%CI, 95% confidence interval; ICU, Intensive care unit.

<sup>a</sup>. Variables inserted in step 1: sex, age, race, schooling, zone, residing in influenza syndrome outbreak area, presence of nosocomial infection, clinical signs (fever, cough, sore throat, dyspnea, respiratory distress, peripheral arterial oxygen saturation (SpO<sub>2</sub>), diarrhea, vomit, abdominal pain, loss of smell, loss of taste, myalgia, headache, coryza, inappetence, cyanosis, nasal obstruction, vertigo, nausea, chills, sneeze, back pain, lower limb pain, flu vaccination, use of the antiviral drug to treat flu symptoms, need for intensive care treatment and need for ventilatory support.
